# Supplementary material for: Novel multiferroic state and ME enhancement by breaking the AFM frustration in LuMn1−xO3
Source: Royal Society of Chemistry journal article supplement (doi:10.1039/c6cp07682c), 2016-11-29
Supplement: c6cp07682c1.pdf [file c6cp07682c1.pdf]

## Novel multiferroic state and magnetoelectric enhancement by breaking the geometric magnetic frustration in LuMn<sub>1-x</sub>O<sub>3</sub>

F. G. Figueiras<sup>1,2,\*</sup>, D. Karpinsky<sup>1,3,4</sup>, P. B. Tavares<sup>5</sup>, J. N. Gonçalves<sup>1</sup>, S. Yañez-Vilar<sup>2</sup>, A. F. Moreira Dos Santos<sup>6</sup>, A. Franz<sup>7</sup>, M. Tovar<sup>7</sup>, J. Agostinho Moreira<sup>2</sup>, . S. Amaral<sup>1</sup>

PCCP (2016)

Supplementary Information

**Table 1:** LuMn<sub>0.98</sub>O<sub>3</sub> crystallographic parameters and Rietveld refinement quality factors calculated from NPD results

| T (K) | S. G.                    | a, b (Å) | a, b Error (Å)      | c (Å)   | c Error (Å)         | Vol. cell Z = 6 (Å <sup>3</sup> ) | density (calc.) | χ <sup>2</sup> | R <sub>p</sub> |
|-------|--------------------------|----------|---------------------|---------|---------------------|-----------------------------------|-----------------|----------------|----------------|
| 2     | P6 <sub>3</sub> cm (185) | 6.0280   | ±1*10 <sup>-4</sup> | 11.3618 | ±2*10 <sup>-4</sup> | 357.534                           | 7.714           | 2.18           | 4.69           |
| 10    | P6 <sub>3</sub> cm (185) | 6.0301   | ±1*10 <sup>-4</sup> | 11.3672 | ±2*10 <sup>-4</sup> | 357.959                           | 7.704           | 2.59           | 7.46           |
| 50    | P6 <sub>3</sub> cm (185) | 6.0299   | ±1*10 <sup>-4</sup> | 11.3656 | ±2*10 <sup>-4</sup> | 357.885                           | 7.706           | 2.38           | 8.31           |
| 80    | P6 <sub>3</sub> cm (185) | 6.0317   | ±1*10 <sup>-4</sup> | 11.3650 | ±2*10 <sup>-4</sup> | 358.080                           | 7.702           | 2.39           | 9.60           |
| 100   | P6 <sub>3</sub> cm (185) | 6.0329   | ±1*10 <sup>-4</sup> | 11.3648 | ±2*10 <sup>-4</sup> | 358.216                           | 7.699           | 2.42           | 11.1           |
| 300   | P6 <sub>3</sub> cm (185) | 6.0448   | ±1*10 <sup>-4</sup> | 11.3653 | ±2*10 <sup>-4</sup> | 359.646                           | 7.668           | 2.55           | 10.4           |

**Table 2:** LuMn<sub>0.98</sub>O<sub>3</sub> unit cell bond and angle between Mn and O ions.

| T (K) | Mn-O1 (Å) #10 | Mn-O2 (Å) #10 | Mn-O3 (Å) #10 | Mn-O4 (Å) #12 | <Mn-O> (Å) #22 | Mn-O3-Mn (°) #2 | Mn-O4-Mn (°) #12 | O1-Mn-O2 (°) #6 | <Mn-Mn> (Å) NN #3 | <Mn-Mn> (Å) NNN #2 |
|-------|---------------|---------------|---------------|---------------|----------------|-----------------|------------------|-----------------|-------------------|--------------------|
| 2     | 1.892         | 1.852         | 1.924         | 2.079         | 2.009          | 117.92          | 118.61           | 172.67          | 3.530             | 6.046              |
| 10    | 1.862         | 1.822         | 2.109         | 1.979         | 2.038          | 118.24          | 119.20           | 175.04          | 3.563             | 6.016              |
| 50    | 1.785         | 1.835         | 2.126         | 1.977         | 2.045          | 116.09          | 119.80           | 176.11          | 3.567             | 6.017              |
| 80    | 1.767         | 1.882         | 2.134         | 1.976         | 2.048          | 115.48          | 119.84           | 176.52          | 3.575             | 6.016              |
| 100   | 1.828         | 1.859         | 2.140         | 1.975         | 2.050          | 115.95          | 119.55           | 175.52          | 3.585             | 6.015              |
| 300   | 1.828         | 1.884         | 2.078         | 2.011         | 2.041          | 116.32          | 119.28           | 179.49          | 3.576             | 6.026              |

**Table 3:** LuMn<sub>0.98</sub>O<sub>3</sub> hexagonal unit cell magnetic moment projections and basal polarization calculated from NPD results

| T (K) | <μ>/Mn (μ <sub>B</sub> ) | Σμ <sub>x</sub> (μ <sub>B</sub> ) | Σμ <sub>y</sub> (μ <sub>B</sub> ) | Σμ <sub>z</sub> (μ <sub>B</sub> ) | μ /cell (μ <sub>B</sub> ) | P <sub>x</sub> (μ <sub>i</sub> ) *K <sub>μ</sub> | P <sub>y</sub> (μ <sub>i</sub> ) *K <sub>μ</sub> | P <sub>xy</sub>   (μ <sub>i</sub> ) *K <sub>μ</sub> (μ) |
|-------|--------------------------|-----------------------------------|-----------------------------------|-----------------------------------|---------------------------|--------------------------------------------------|--------------------------------------------------|---------------------------------------------------------|
| 2     | 2.84 ±8%                 | -2.301                            | -1.351                            | 0.613                             | 2.094                     | 23.92                                            | -5.33                                            | 24.50                                                   |
| 10    | 2.7 ±8%                  | -1.984                            | -1.136                            | 0.724                             | 1.778                     | 26.21                                            | -1.72                                            | 26.27                                                   |
| 50    | 2.1 ±8%                  | -2.981                            | -1.343                            | 0.065                             | 1.913                     | 17.58                                            | -0.05                                            | 17.58                                                   |
| 80    | 1.9 ±8%                  | -2.536                            | -1.219                            | 0.911                             | 1.591                     | 27.45                                            | -0.80                                            | 27.46                                                   |
| 100   | n. a.                    | 0                                 | 0                                 | 0                                 | 0                         | 0                                                | 0                                                | 0                                                       |
| 300   | n. a.                    | 0                                 | 0                                 | 0                                 | 0                         | 0                                                | 0                                                | 0                                                       |

**Table 4:** LuMn<sub>0.98</sub>O<sub>3</sub> hexagonal unit cell atomic positions and Mn ions magnetic moments calculated from NPD results

| T (K)    | atom | Z  | site | x      | y      | z      |
|----------|------|----|------|--------|--------|--------|
| <b>2</b> | Lu1  | 71 | 2a   | 0.0000 | 0.0000 | 0.2779 |
|          | Lu2  | 71 | 4b   | 0.3333 | 0.6667 | 0.2345 |
|          | Mn   | 25 | 6c   | 0.3157 | 0.0000 | 0.0000 |
|          | O1   | 8  | 6c   | 0.3087 | 0.0000 | 0.1665 |
|          | O2   | 8  | 6c   | 0.6383 | 0.0000 | 0.3388 |
|          | O3   | 8  | 2a   | 0.0000 | 0.0000 | 0.4754 |
|          | O4   | 8  | 4b   | 0.3333 | 0.6667 | 0.0217 |

| atom | x     | y     | z   | $\mu_x$ ( $\mu_B$ ) | $\mu_y$ ( $\mu_B$ ) | $\mu_z$ ( $\mu_B$ ) |
|------|-------|-------|-----|---------------------|---------------------|---------------------|
| Mn1  | 0.316 | 0     | 0   | -2.704              | -2.956              | 0.098               |
| Mn2  | 0     | 0.316 | 0   | -0.011              | -2.844              | 0.100               |
| Mn3  | 0.666 | 0.666 | 0   | 2.367               | 3.146               | 0.107               |
| Mn4  | 0.316 | 0.316 | 0.5 | -1.952              | 1.304               | 0.108               |
| Mn5  | 0.666 | 0     | 0.5 | 1.233               | -2.013              | 0.100               |
| Mn6  | 0     | 0.666 | 0.5 | -1.235              | 2.012               | 0.100               |

| T (K)     | atom | Z  | site | x      | y      | z      |
|-----------|------|----|------|--------|--------|--------|
| <b>10</b> | Lu1  | 71 | 2a   | 0.0000 | 0.0000 | 0.2684 |
|           | Lu2  | 71 | 4b   | 0.3333 | 0.6667 | 0.2298 |
|           | Mn   | 25 | 6c   | 0.3466 | 0.0000 | 0.0000 |
|           | O1   | 8  | 6c   | 0.3065 | 0.0000 | 0.1624 |
|           | O2   | 8  | 6c   | 0.6402 | 0.0000 | 0.3399 |
|           | O3   | 8  | 2a   | 0.0000 | 0.0000 | 0.4652 |
|           | O4   | 8  | 4b   | 0.3333 | 0.6667 | 0.0156 |

| atom | x     | y     | z   | $\mu_x$ ( $\mu_B$ ) | $\mu_y$ ( $\mu_B$ ) | $\mu_z$ ( $\mu_B$ ) |
|------|-------|-------|-----|---------------------|---------------------|---------------------|
| Mn1  | 0.344 | 0     | 0   | -2.191              | -3.200              | 0.193               |
| Mn2  | 0     | 0.344 | 0   | -0.639              | -3.103              | 0.104               |
| Mn3  | 0.656 | 0.656 | 0   | 2.147               | 3.215               | 0.151               |
| Mn4  | 0.344 | 0.344 | 0.5 | -1.330              | 1.927               | 0.145               |
| Mn5  | 0.656 | 0     | 0.5 | 1.076               | -2.143              | 0.102               |
| Mn6  | 0     | 0.656 | 0.5 | -1.046              | 2.168               | 0.029               |

| T (K)     | atom | Z  | site | x      | y      | z      |
|-----------|------|----|------|--------|--------|--------|
| <b>50</b> | Lu1  | 71 | 2a   | 0.0000 | 0.0000 | 0.2629 |
|           | Lu2  | 71 | 4b   | 0.3333 | 0.6667 | 0.2209 |
|           | Mn   | 25 | 6c   | 0.3455 | 0.0000 | 0.0000 |
|           | O1   | 8  | 6c   | 0.3098 | 0.0000 | 0.1559 |
|           | O2   | 8  | 6c   | 0.6384 | 0.0000 | 0.3333 |
|           | O3   | 8  | 2a   | 0.0000 | 0.0000 | 0.4625 |
|           | O4   | 8  | 4b   | 0.3333 | 0.6667 | 0.0077 |

| atom | x     | y     | z   | $\mu_x$ ( $\mu_B$ ) | $\mu_y$ ( $\mu_B$ ) | $\mu_z$ ( $\mu_B$ ) |
|------|-------|-------|-----|---------------------|---------------------|---------------------|
| Mn1  | 0.344 | 0     | 0   | -1.767              | -3.276              | 0.004               |
| Mn2  | 0     | 0.344 | 0   | -1.446              | -3.272              | 0.009               |
| Mn3  | 0.656 | 0.656 | 0   | 1.580               | 3.279               | 0.003               |
| Mn4  | 0.344 | 0.344 | 0.5 | -1.075              | 2.146               | 0.002               |
| Mn5  | 0.656 | 0     | 0.5 | 0.936               | -2.254              | 0.017               |
| Mn6  | 0     | 0.656 | 0.5 | -1.210              | 2.034               | 0.030               |

| T (K)     | atom | Z  | site | x      | y      | z      |
|-----------|------|----|------|--------|--------|--------|
| <b>80</b> | Lu1  | 71 | 2a   | 0.0000 | 0.0000 | 0.2613 |
|           | Lu2  | 71 | 4b   | 0.3333 | 0.6667 | 0.2208 |
|           | Mn   | 25 | 6c   | 0.3455 | 0.0000 | 0.0000 |
|           | O1   | 8  | 6c   | 0.3094 | 0.0000 | 0.1543 |
|           | O2   | 8  | 6c   | 0.6349 | 0.0000 | 0.3347 |
|           | O3   | 8  | 2a   | 0.0000 | 0.0000 | 0.4595 |
|           | O4   | 8  | 4b   | 0.3333 | 0.6667 | 0.0070 |

| atom | x     | y     | z   | $\mu_x$ ( $\mu_B$ ) | $\mu_y$ ( $\mu_B$ ) | $\mu_z$ ( $\mu_B$ ) |
|------|-------|-------|-----|---------------------|---------------------|---------------------|
| Mn1  | 0.344 | 0     | 0   | -2.207              | -3.186              | 0.273               |
| Mn2  | 0     | 0.344 | 0   | -0.766              | -3.142              | 0.124               |
| Mn3  | 0.656 | 0.656 | 0   | 1.852               | 3.261               | 0.200               |
| Mn4  | 0.344 | 0.344 | 0.5 | -1.450              | 1.817               | 0.158               |
| Mn5  | 0.656 | 0     | 0.5 | 1.076               | -2.142              | 0.120               |
| Mn6  | 0     | 0.656 | 0.5 | -1.041              | 2.173               | 0.035               |

| T (K)      | atom | Z  | site | x      | y      | z      |
|------------|------|----|------|--------|--------|--------|
| <b>100</b> | Lu1  | 71 | 2a   | 0.0000 | 0.0000 | 0.2662 |
|            | Lu2  | 71 | 4b   | 0.3333 | 0.6667 | 0.2264 |
|            | Mn   | 25 | 6c   | 0.3473 | 0.0000 | 0.0000 |
|            | O1   | 8  | 6c   | 0.3087 | 0.0000 | 0.1595 |
|            | O2   | 8  | 6c   | 0.6374 | 0.0000 | 0.3366 |
|            | O3   | 8  | 2a   | 0.0000 | 0.0000 | 0.4616 |
|            | O4   | 8  | 4b   | 0.3333 | 0.6667 | 0.0117 |

| T (K)      | atom | Z  | site | x      | y      | z      |
|------------|------|----|------|--------|--------|--------|
| <b>300</b> | Lu1  | 71 | 2a   | 0.0000 | 0.0000 | 0.2697 |
|            | Lu2  | 71 | 4b   | 0.3333 | 0.6667 | 0.2287 |
|            | Mn   | 25 | 6c   | 0.3372 | 0.0000 | 0.0000 |
|            | O1   | 8  | 6c   | 0.3094 | 0.0000 | 0.1602 |
|            | O2   | 8  | 6c   | 0.6369 | 0.0000 | 0.3348 |
|            | O3   | 8  | 2a   | 0.0000 | 0.0000 | 0.4645 |
|            | O4   | 8  | 4b   | 0.3333 | 0.6667 | 0.0151 |
